# Supplementary material
Source: publisher site journal article supplement (https://www.dovepress.com/article/313078)
Supplement: Supplementary file 1 [file get_supplementary_file.php]

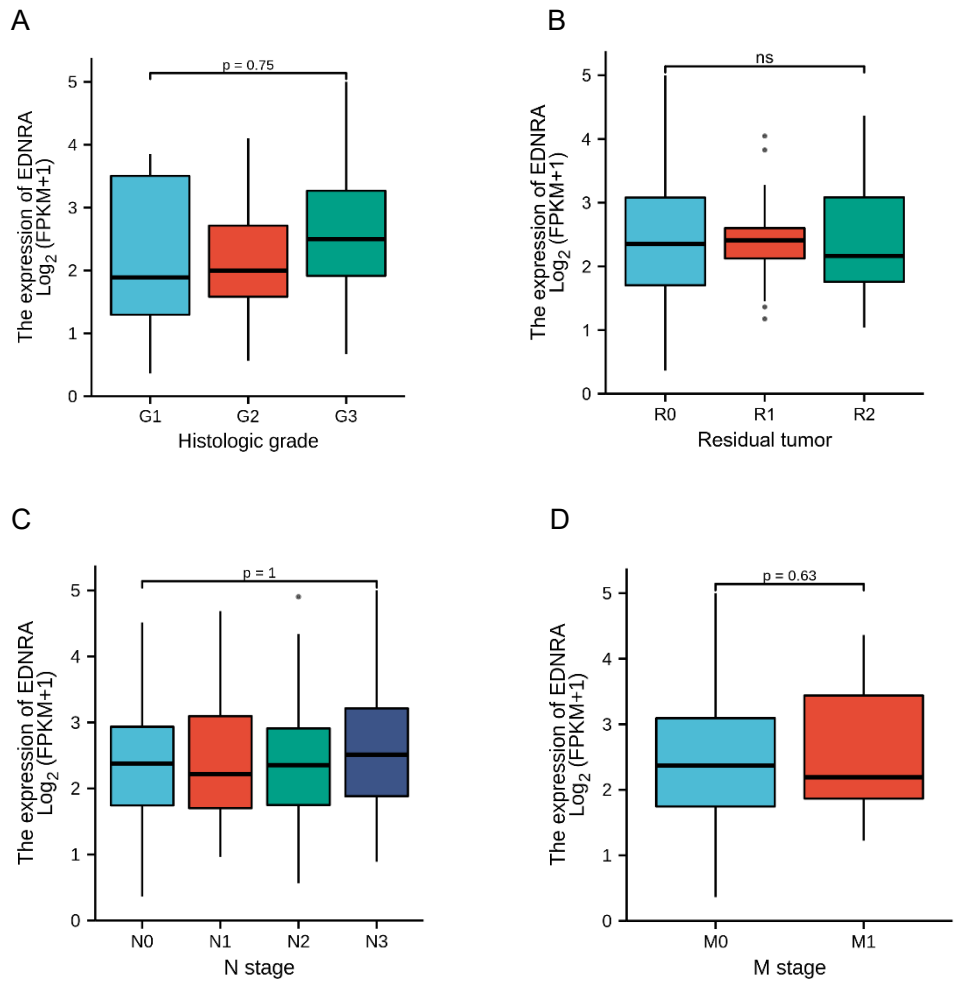

**Supplementary Figure 1. Box plot assessing EDNRA expression of patients with STAD according to different clinical characteristics. (A) histologic grade; (B) residual tumor; (C) N classification; (D) M classification.**
